# Supplementary material for: Microphase-separated, magnetic macroporous polymers with amphiphilic swelling from emulsion templating
Source: Royal Society of Chemistry journal article supplement (doi:10.1039/d1py01584b), 2022-01-01
Supplement: d1py01584b1.pdf [file d1py01584b1.pdf]

*Electronic Supplementary Information*

*For*

**Microphase-separated, magnetic macroporous polymers with  
amphiphilic swelling from emulsion templating**

Tao Zhang,<sup>\*a,b</sup> Hui Cao,<sup>a</sup> Haoguan Gui,<sup>c</sup> Zhiguang Xu<sup>d</sup> and Yan Zhao<sup>\*a</sup>

<sup>a</sup> College of Textile and Clothing Engineering, Soochow University, Suzhou 215123, China

<sup>b</sup> China National Textile and Apparel Council Key Laboratory of Natural Dyes, Soochow University, Suzhou 215123, China

<sup>c</sup> Advanced Catalysis and Green Manufacturing Collaborative Innovation Center, Changzhou University, Changzhou 213164, China

<sup>d</sup> China-Australia Institute for Advanced Materials and Manufacturing, Jiaxing University, Jiaxing 314001, China

***Corresponding authors:***

[zhang.tao@suda.edu.cn](mailto:zhang.tao@suda.edu.cn) (T. Zhang)

[yanzhao@suda.edu.cn](mailto:yanzhao@suda.edu.cn) (Y. Zhao)

## 1. Chemical structure

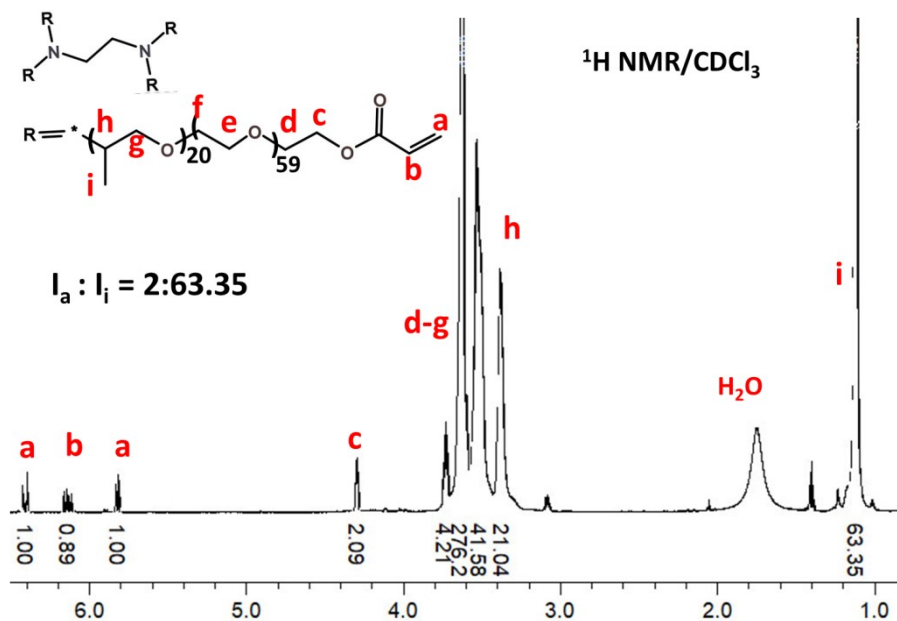

**Fig. S1.**  $^1\text{H}$  NMR spectrum of T1107-TA in  $\text{CDCl}_3$ .

The  $^1\text{H}$  NMR spectrum of the T1107-TA (Fig. S1) has an integral ratio of  $I_a$  (the hydrogen of the acrylate) to  $I_i$  (the methyl of PPO) at 2:63.35. The theoretical  $I_a:I_i$  from the complete reaction between acryloyl chloride and the T1107 hydroxyl end groups is 2:60, and thus the  $^1\text{H}$  NMR results show that around 94 % of the hydroxyl end groups on the T1107 were endcapped with reactive acrylate groups.

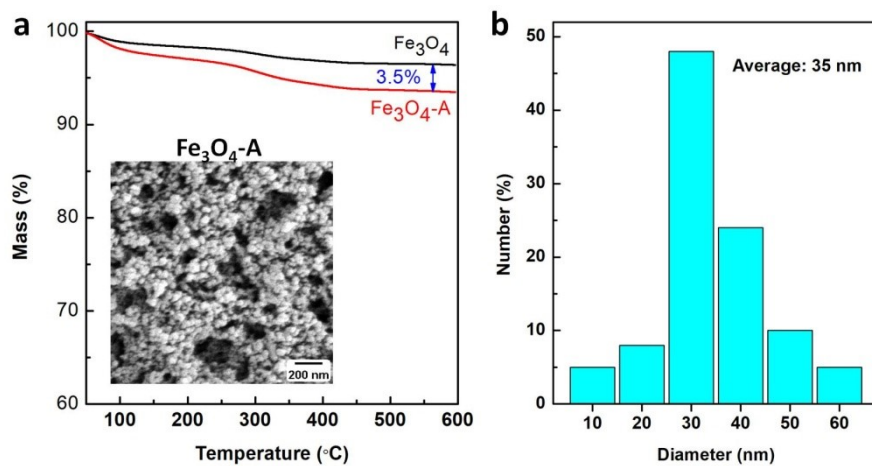

**Fig. S2.** (a) TGA curves of Fe<sub>3</sub>O<sub>4</sub> and Fe<sub>3</sub>O<sub>4</sub>-A (the insert showing the morphology of Fe<sub>3</sub>O<sub>4</sub>-A from SEM); (b) Diameter distribution of Fe<sub>3</sub>O<sub>4</sub>-A from SEM micrograph.

From TGA curves in Fig. S2a, the mass loss of Fe<sub>3</sub>O<sub>4</sub>-A was around 7.0% after heating to 600 °C, much higher than that of the pristine Fe<sub>3</sub>O<sub>4</sub> at 3.5%. The significant increase (around 3.5%) in the mass loss can be ascribed to the loss of (3-acryloyloxy)propyltrimethoxysilane.

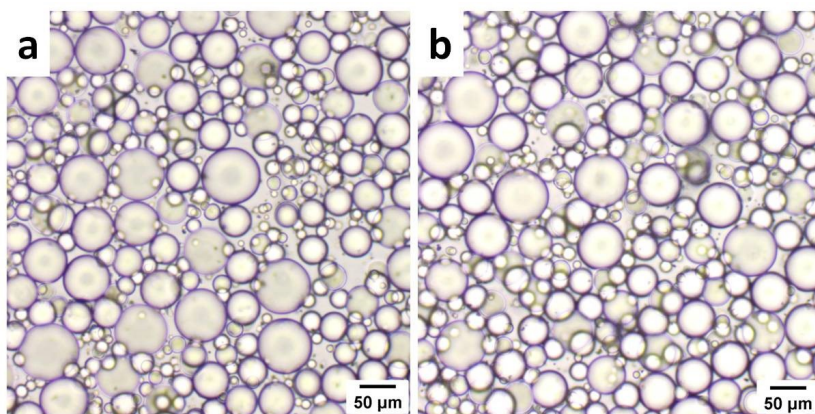

**Fig. S3.** Optical micrographs of (a) as-prepared HIPE (mPT-2) and (b) the HIPE after storage for a week.

**Table S1.** HIPE recipes

|                                     | Control 1             | Control 2        |
|-------------------------------------|-----------------------|------------------|
| External, aqueous phase, wt. %      |                       |                  |
| T1107                               | 1.00                  | 1.00             |
| Fe <sub>3</sub> O <sub>4</sub> -A   | 4.00                  | 0.00             |
| Acrylamide                          | 2.00                  | 2.00             |
| H <sub>2</sub> O                    | 13.00                 | 17.00            |
| APS                                 | 0.05                  | 0.05             |
| Total                               | 20.05                 | 20.05            |
| Internal, organic phase, wt. %      |                       |                  |
| Toluene                             | 79.90                 | 79.90            |
| TEMED (adding after HIPE formation) |                       |                  |
|                                     | 0.05                  | 0.05             |
| Appearance after polymerization     | Flow-free, monolithic | Viscous emulsion |

To verify the reactivity of the Fe<sub>3</sub>O<sub>4</sub>-A, two control HIPEs (recipes in Table S1) were prepared and then were polymerized, with procedures the same as that for mPT-*X* preparation. Results found monolithic gel was formed from Control 1 but not from Control 2, indicating the Fe<sub>3</sub>O<sub>4</sub>-A serving as crosslinker.

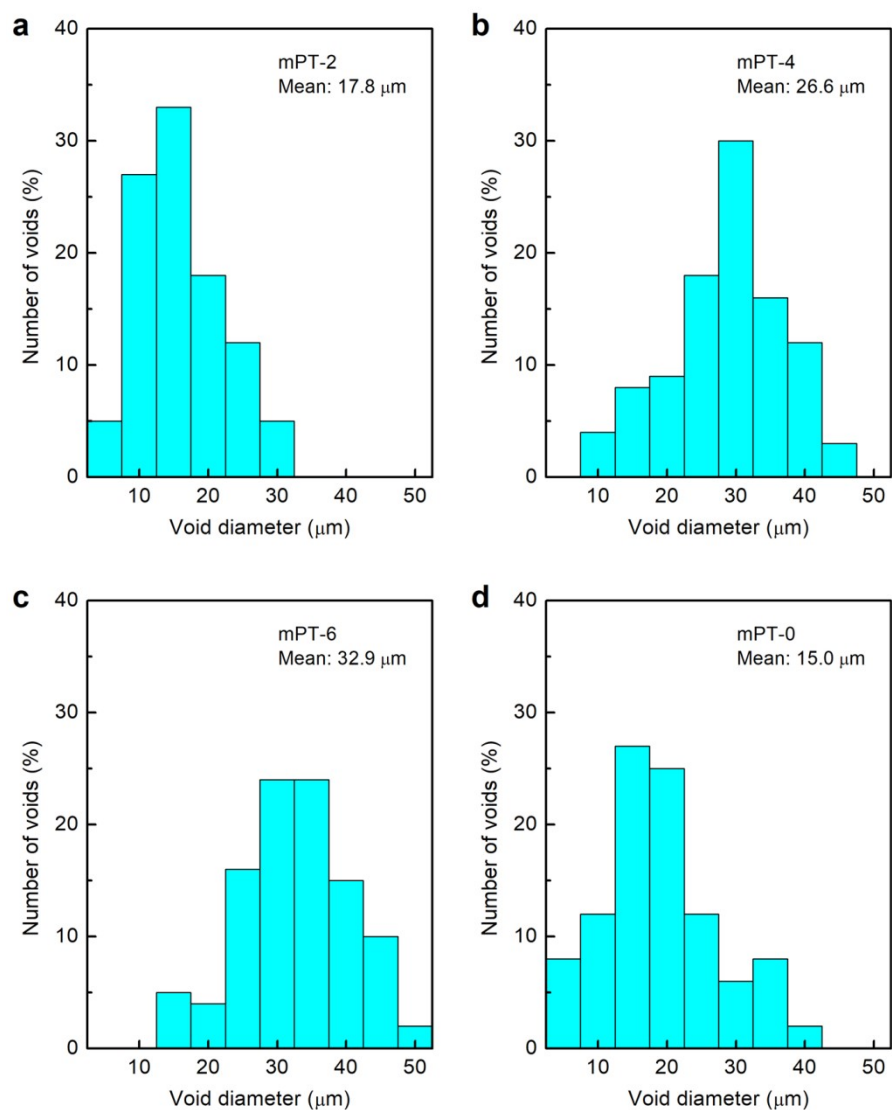

**Fig. S4.** Void diameter distributions of the mPT-Xs and PT-0.

**Movie S1:** Moving a dry mPT-4 disc using a magnetic bar from the outside of a centrifuging tube.
